# Supplementary material for: Influence of excitation and detection geometry on optical temperature readouts – reabsorption effects in luminescence thermometry
Source: Royal Society of Chemistry journal article supplement (doi:10.1039/d3tc01684f), 2023-01-01
Supplement: d3tc01684f1.pdf [file d3tc01684f1.pdf]

Supporting Information for:

**Influence of excitation and detection geometry on optical temperature  
readouts – reabsorption effects in luminescence thermometry**

*Natalia Stopikowska,<sup>\*,a</sup> Przemysław Woźny,<sup>a</sup> Markus Suta,<sup>b</sup> Teng Zheng,<sup>\*,c</sup> Stefan Lis<sup>a</sup> and  
Marcin Runowski<sup>\*,a,d</sup>*

<sup>a</sup>*Adam Mickiewicz University, Faculty of Chemistry, Uniwersytetu Poznańskiego 8, 61-614  
Poznań, Poland*

<sup>b</sup>*Inorganic Photoactive Materials, Institute of Inorganic and Structural Chemistry, Heinrich  
Heine University Düsseldorf, Universitätsstraße 1, 40225 Düsseldorf, Germany*

<sup>c</sup>*School of Information and Electrical Engineering, Hangzhou City University, Hangzhou,  
Zhejiang, China*

<sup>d</sup>*Universidad de La Laguna, Departamento de Física, MALTA-Consolider Team, IMN and  
IUdEA, Apdo. Correos 456, E-38200, San Cristóbal de La Laguna, Santa Cruz de Tenerife,  
Spain*

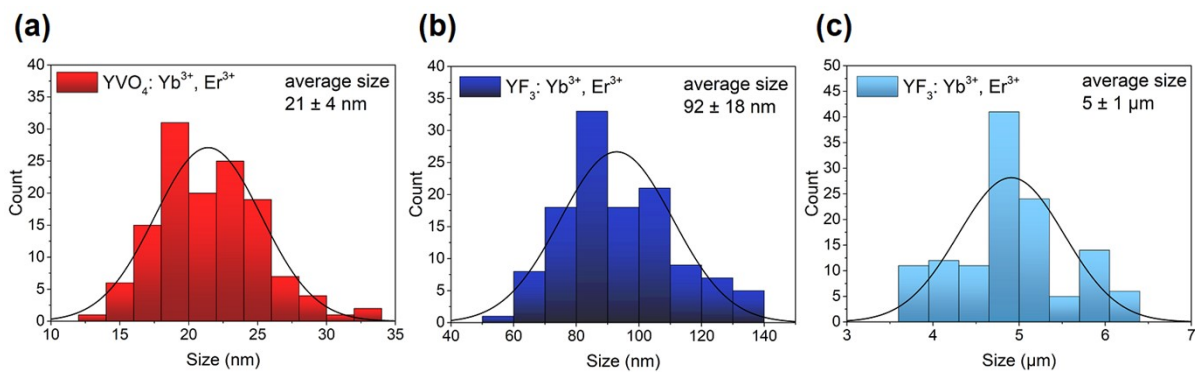

**Figure S1.** Particle size distributions of **(a)** nanocrystalline YVO<sub>4</sub>: Yb<sup>3+</sup>, Er<sup>3+</sup>, **(b)** nanocrystalline YF<sub>3</sub>: Yb<sup>3+</sup>, Er<sup>3+</sup>, and **(c)** microcrystalline YF<sub>3</sub>: Yb<sup>3+</sup>, Er<sup>3+</sup>.

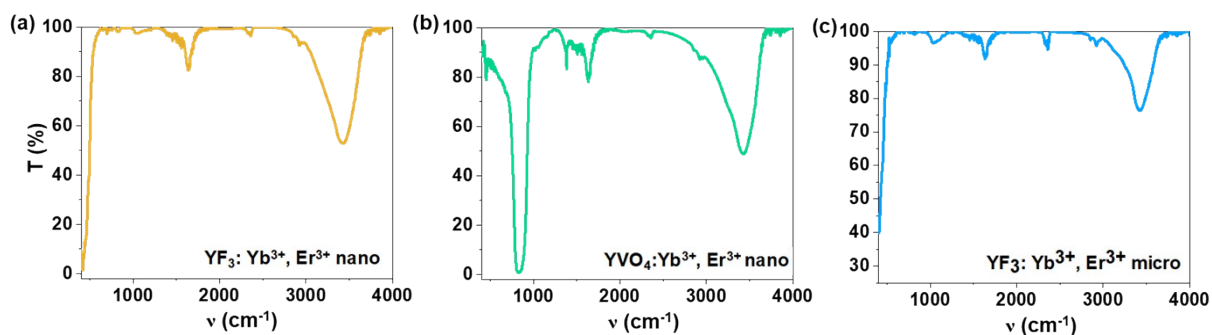

**Figure S2.** FT-IR spectra of **(a)** nanocrystalline YF<sub>3</sub>: Yb<sup>3+</sup>, Er<sup>3+</sup>, **(b)** nanocrystalline YVO<sub>4</sub>: Yb<sup>3+</sup>, Er<sup>3+</sup>, and **(c)** microcrystalline YF<sub>3</sub>: Yb<sup>3+</sup>, Er<sup>3+</sup>.

In order to determine the number of photons participating in the transitions associated with the observed UC emission bands we have used the well-known relation  $I_{UC} \propto (I_{pump})^n$ . In this relation  $I_{UC}$  is the UC emission intensity,  $I_{pump}$  is the pump laser power density and  $n$  is the number of photons involved in the UC mechanism. Performing a simple linear fitting,  $n$  can be calculated from the slopes of the plotted UC emission intensity as a function of the pump power, both in the logarithmic representations.

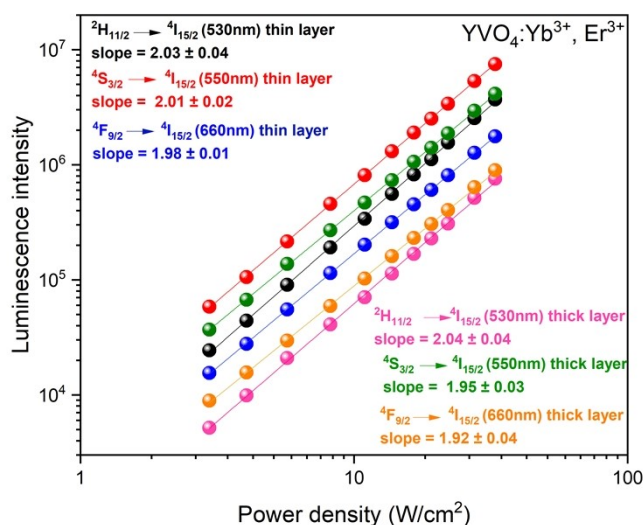

**Figure S3.** Double logarithmic plot of the incident laser power density vs. the luminescence intensity for  $YVO_4: 20\% Yb^{3+}, 2\% Er^{3+}$ .

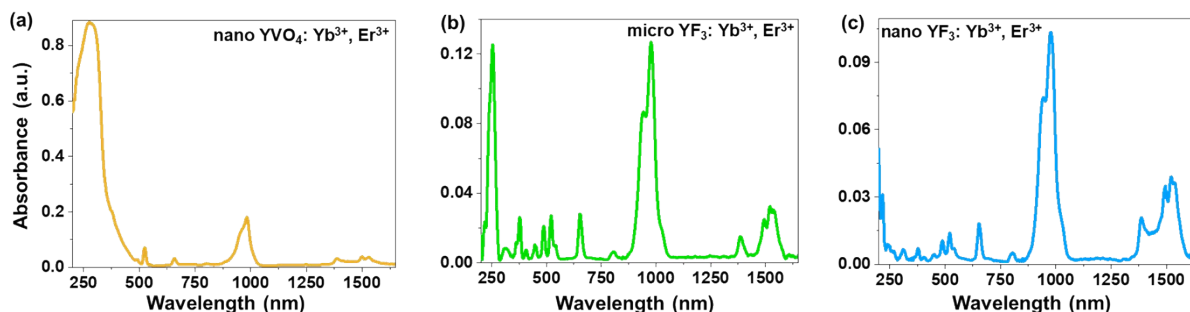

**Figure S4.** Absorption spectra of (a) nanocrystalline  $YVO_4: Yb^{3+}, Er^{3+}$ , (b) microcrystalline  $YF_3: Yb^{3+}, Er^{3+}$ , and (c) nanocrystalline  $YF_3: Yb^{3+}, Er^{3+}$ .

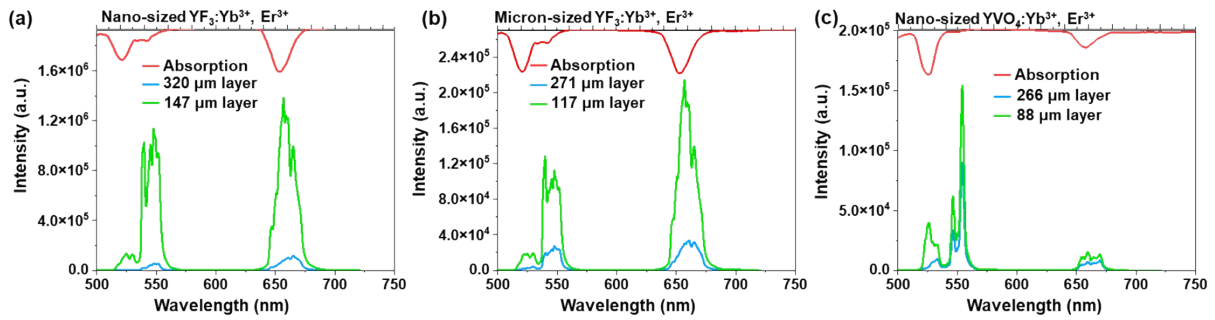

**Figure S5.** Non-normalized UC emission spectra of **(a)** the nano-sized  $\text{YVO}_4: \text{Yb}^{3+}, \text{Er}^{3+}$ , **(b)** micron-sized  $\text{YF}_3: \text{Yb}^{3+}, \text{Er}^{3+}$ , and **(c)** nano-sized  $\text{YF}_3: \text{Yb}^{3+}, \text{Er}^{3+}$ , recorded for different sample thicknesses; ( $\lambda_{\text{ex}} = 975 \text{ nm}$ , bottom) combined with absorption spectra (top) of the obtained products.

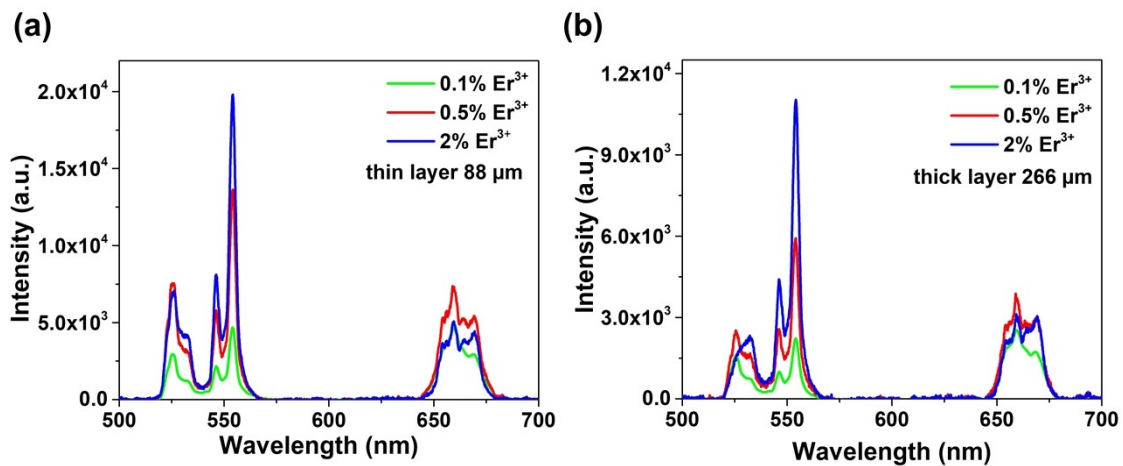

**Figure S6.** Non-normalized UC emission spectra of nanocrystalline  $\text{YVO}_4: \text{Yb}^{3+}, \text{Er}^{3+}$ , recorded for different concentrations of  $\text{Er}^{3+}$  (0.1%, 0.5% and 2%) and for different sample thicknesses: **(a)**  $88 \mu\text{m}$  and **(b)**  $266 \mu\text{m}$ ;  $\lambda_{\text{ex}} = 975 \text{ nm}$ .

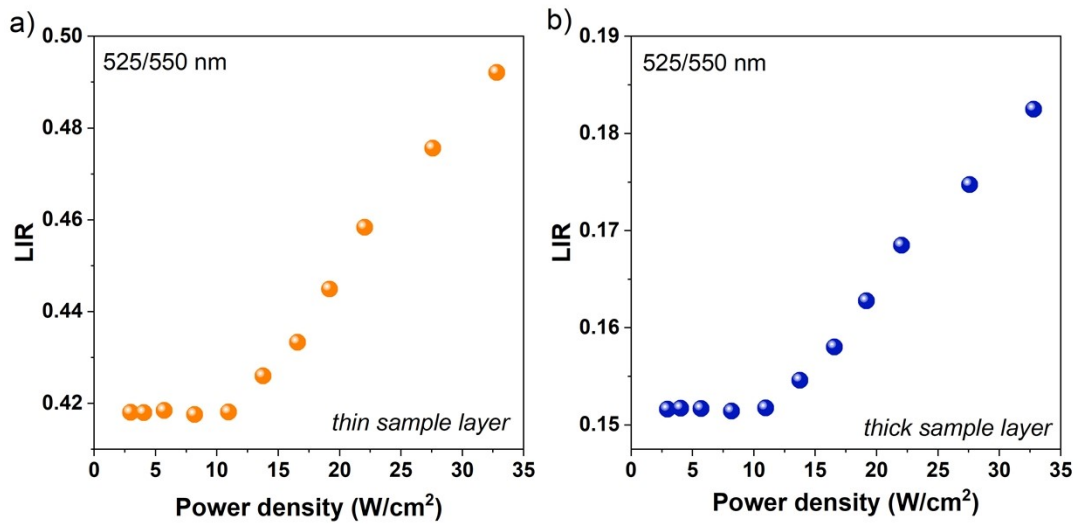

**Figure S7.** Determined LIR values for  $\text{Er}^{3+}$  TCLs ( ${}^2\text{H}_{11/2} \rightarrow {}^4\text{I}_{15/2} / {}^4\text{S}_{3/2} \rightarrow {}^4\text{I}_{15/2}$ ) as a function of laser power density for (a) the thin layer sample  $88 \mu\text{m}$  and (b) thick layer sample  $266 \mu\text{m}$ .

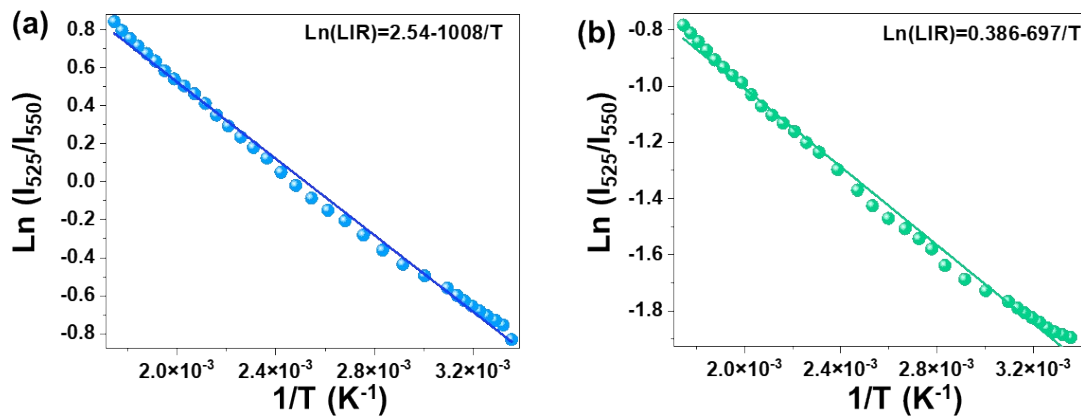

**Figure S8.** The determined LIR values ( $525/550 \text{ nm}$ ) as a function of inverse temperature for  $\text{YVO}_4: \text{Yb}^{3+}, \text{Er}^{3+}$  for (a) thin layer and (b) thick layer of sample.
